# Supplementary material for: Substrate-dependent oxidative inactivation of a W-dependent formate dehydrogenase involving selenocysteine displacement
Source: Royal Society of Chemistry journal article supplement (doi:10.1039/d4sc02394c), 2024-01-01
Supplement: d4sc02394c1.pdf [file d4sc02394c1.pdf]

## Supplementary Information

### **Substrate-dependent oxidative inactivation of a W-dependent formate dehydrogenase involving selenocysteine displacement.**

Guilherme Vilela-Alves<sup>1,2</sup>, Rita R. Manuel<sup>3</sup>, Aldino Viegas<sup>1,2</sup>, Philippe Carpentier<sup>4,5</sup>, Frederic Biaso<sup>6</sup>, Bruno Guigliarelli<sup>6</sup>, Inês A. C. Pereira<sup>3\*</sup>, Maria João Romão<sup>1,2\*</sup> and Cristiano Mota<sup>1,2\*</sup>

<sup>1</sup>Associate Laboratory i4HB – Institute for Health and Bioeconomy, NOVA School of Science and Technology, Universidade NOVA de Lisboa, 2829-516 Caparica, Portugal

<sup>2</sup>UCIBIO, Applied Molecular Biosciences Unit, Department of Chemistry, NOVA School of Science and Technology, Universidade NOVA de Lisboa, 2829-516 Caparica, Portugal

<sup>3</sup>Instituto de Tecnologia Química e Biológica António Xavier, Universidade Nova de Lisboa, Av. da República, 2780-157 Oeiras, Portugal

<sup>4</sup>European Synchrotron Radiation Facility, Grenoble, France

<sup>5</sup>Institut de Recherche Interdisciplinaire de Grenoble (IRIG), Laboratoire Chimie et Biologie des Métaux (LCBM), Université Grenoble Alpes, CNRS, CEA, Grenoble, France

<sup>6</sup>Aix Marseille Univ, CNRS, BIP, Laboratoire de Bioénergétique et Ingénierie des Protéines, Marseille 13402, France

\*Corresponding authors: [mjr@fct.unl.pt](mailto:mjr@fct.unl.pt), [cd.mota@fct.unl.pt](mailto:cd.mota@fct.unl.pt), [ipereira@itqb.unl.pt](mailto:ipereira@itqb.unl.pt)

## Index

|                                                                                                                                                                                                                                                                                                                                   |    |
|-----------------------------------------------------------------------------------------------------------------------------------------------------------------------------------------------------------------------------------------------------------------------------------------------------------------------------------|----|
| Supplementary Discussion: Computational calculations of magnetic parameters.....                                                                                                                                                                                                                                                  | 3  |
| Table S 1- Description of the procedure used to obtain the different structures of <i>DvFdhAB</i> in this and other works. .                                                                                                                                                                                                      | 4  |
| Table S 2- Distances between the W ion, Se atom of SeCys and the (di)oxygen ligand atom(s) for the Control_Red ,<br>Reox_120min, Reox_ND_NoFormate, Reox_ND_Formate and HP_CO <sub>2</sub> structures (with respective crystallographic<br>resolutions) and of the optimized W <sup>V</sup> structural models (Figure S12). ..... | 5  |
| Table S 3- B-factor values for the W ion, sulfido ligand (S), the four sulfur atoms of the 2 dithiolenes, Se atom of<br>SeCys and the two atoms of the dioxygen molecule for the Control_Red, Reox_12min, Reox_120min,<br>Reox_ND_No_Formate, Reox_ND_Formate and HP_CO <sub>2</sub> structures and respective resolutions.....   | 6  |
| Table S 4- Crystallographic data processing and refinement statistics. ....                                                                                                                                                                                                                                                       | 7  |
| Table S 5- DFT-predicted g-values for the optimized W <sup>V</sup> structural models (Figure S12). ....                                                                                                                                                                                                                           | 10 |
| Figure S 1- Superposition of <i>DvFdhAB</i> WT formate reduced (PDB_ ID: 6SDV) (green) and Control_Red structure<br>(orange) in two different views. ....                                                                                                                                                                         | 11 |
| Figure S 2- Superposition of <i>DvFdhAB</i> WT as-isolated (oxidized) (PDB_ID: 6SDR) (red), formate reduced (green)<br>and oxygen exposed Reox_12min structure (yellow) in two different views. ....                                                                                                                              | 12 |
| Figure S 3- Solved, unrefined, structure obtained from the <i>DvFdhAB</i> WT crystals co-crystallized with formate and<br>exposed to air for 20 min. ....                                                                                                                                                                         | 13 |
| Figure S 4- Alternative modelling of different ligands for the electron density between W and Se in the <i>DvFdhAB</i><br>Reox_120min structures. ....                                                                                                                                                                            | 14 |
| Figure S 5- Structural models of the W <sup>V</sup> cofactor used for DFT calculations.....                                                                                                                                                                                                                                       | 15 |
| Figure S 6- Optimized geometry of the W <sup>V</sup> models obtained by DFT calculations. ....                                                                                                                                                                                                                                    | 16 |
| Figure S 7- Comparison of the metal coordination between the dioxygen/peroxide containing active sites of <i>DvFdhAB</i><br>Reox_120min (cyan) and <i>DgAOR</i> H <sub>2</sub> O <sub>2</sub> -soaked (PDB_ID: 4C80) (brown). ....                                                                                                | 17 |
| Figure S 8- Superposition of <i>DvFdhAB</i> WT as-isolated (oxidized) (PDB_ID: 6SDR) (red) and oxygen exposed<br>Reox_ND_NoFormate structure (blue) in two different views.....                                                                                                                                                   | 18 |
| Figure S 9- Control HP experiment with anaerobic <i>DvFdhAB</i> crystals under CO <sub>2</sub> pressure. ....                                                                                                                                                                                                                     | 19 |
| Figure S 10- Relative activity for CO <sub>2</sub> reduction (red) and formate oxidation (blue) of as-isolated <i>DvFdhAB</i> incubated<br>in anaerobic conditions in the presence of CO <sub>2</sub> .....                                                                                                                       | 20 |
| Figure S 11- Relative activity for CO <sub>2</sub> reduction of as-isolated <i>DvFdhAB</i> incubated in aerobic conditions in the<br>presence of CO <sub>2</sub> .....                                                                                                                                                            | 21 |
| Figure S 12- <i>DvFdhAB</i> activity assays by <sup>1</sup> H NMR. ....                                                                                                                                                                                                                                                           | 22 |
| Figure S 13- Solved, unrefined, structure (yellow) obtained from the <i>DvFdhAB</i> WT crystals produced with the<br>concentrated solution left from the NMR experiments with formate under air, at a resolution of 2.83 Å. ....                                                                                                  | 23 |
| Figure S 14- Formate oxidation activity measured in aerobic and anaerobic conditions, of as-isolated WT <i>DvFdhAB</i><br>and C872A variant (this variant is equivalent to the DTT-activated form <sup>4</sup> ). ....                                                                                                            | 24 |
| Figure S 15- Influence of formate and oxygen exposure on FeS center EPR signals of <i>DvFdhAB</i> .....                                                                                                                                                                                                                           | 25 |
| References.....                                                                                                                                                                                                                                                                                                                   | 26 |

## Supplementary Discussion: DFT calculations of the potential influence of SeCys displacement on the W(V) cofactor g-values

As the g-values of W(V) species can range in a very broad domain and to help detection of potentially new W(V) EPR signals, a quantum chemistry study was performed on several W(V) cofactor models to evaluate the potential influence of SeCys displacement and the binding of oxygenated species on the W(V) g-tensor. Eight structural models (numbered 1 to 8) (Figure S5 and S6) were built based on the structure of the formate and oxygen-treated DvFdhAB (Reox\_120min). These models have in common the coordination of W(V) ion by the four sulfur atoms of the two pterins, a  $\eta^2(\text{O-O})$  or water ligand and a displaced SeCys, while they differ in the nature of the exogenous ligand (sulfur or oxygen), the protonation state of the cofactor and possible H-bonds between a  $\eta^2(\text{O-O})$  or water ligand and sulfur and/or selenium atoms (Figure S5 and S6). Optimized geometry consistent with protein surrounding constraints could be obtained only for structural models 1-3 and 7. The g-values of W(V) species were calculated for these models. This gives values ranging from about  $g = 2.1$  to  $2.6$  (Table S5) for models 1-3, much higher than the values observed experimentally for the W(V)F and W(V)D species and calculated for models with bound SeCys ligand.<sup>1</sup> Moreover, the g-values calculated for model 7 are much lower than  $g=2.00$  and does not fit with those of W(V)F and W(V)D species. Thus, in complement to models investigated in previous work,<sup>1</sup> these DFT calculations provide additional support to show that the experimentally detected W(V)F and W(V)D species associated to active DvFdh does not correspond to species with non-coordinated SeCys.

**Table S 1- Description of the procedure used to obtain the different structures of DvFdhAB in this and other works.**

| <b>Structure</b>                             | <b>Procedure</b>                                                                                                                                                                                                                                                                                                                                        |
|----------------------------------------------|---------------------------------------------------------------------------------------------------------------------------------------------------------------------------------------------------------------------------------------------------------------------------------------------------------------------------------------------------------|
| As-isolated <sup>2</sup><br>PDB_ID: 6SDR     | <i>DvFdhAB</i> crystallized <b>as-isolated</b> in the presence of O <sub>2</sub> (As-isolated).                                                                                                                                                                                                                                                         |
| Formate-reduced <sup>2</sup><br>PDB_ID: 6SDV | <i>DvFdhAB</i> co-crystallized with 10 mM of sodium formate and <b>not exposed</b> to O <sub>2</sub> (Reduced).                                                                                                                                                                                                                                         |
| Control_Red<br>PDB_ID: 8RC8                  | <i>DvFdhAB</i> co-crystallized with 10 mM of sodium formate and <b>not exposed</b> to O <sub>2</sub> (Reduced).                                                                                                                                                                                                                                         |
| Reox_12min <sup>3</sup><br>PDB_ID: 8BQL      | <i>DvFdhAB</i> co-crystallized with 10 mM of sodium formate; plate well opened and crystals exposed to atmospheric O <sub>2</sub> , for <b>12 min</b> , while still in the original drop (which <b>contains</b> 10 mM of sodium formate), and then flash cooled in liquid nitrogen (as-isolated/Oxidized).                                              |
| Reox_120min<br>PDB_ID: 8RC9                  | <i>DvFdhAB</i> co-crystallized with 10 mM of sodium formate; plate well opened and the crystals were exposed to atmospheric O <sub>2</sub> , for <b>120 min</b> , while still in the original drop (which <b>contains</b> 10 mM of sodium formate), and then flash cooled in liquid nitrogen (W-O=O...SeCys form).                                      |
| Reox_ND_NoFormate<br>PDB_ID: 8RCA            | <i>DvFdhAB</i> co-crystallized with 10 mM of sodium formate; the crystals were transferred from the original drop to a <b>New Drop</b> (oxygenated), mimicking the mother liquor but <b>without</b> sodium formate, and were exposed to atmospheric O <sub>2</sub> , for 60 min, and then flash cooled in liquid nitrogen (as-isolated/Oxidized).       |
| Reox_ND_Formate<br>PDB_ID: 8RCB              | <i>DvFdhAB</i> co-crystallized with 10 mM of sodium formate; the crystals were transferred from the original drop to a <b>New Drop</b> (oxygenated), mimicking the mother liquor <b>containing</b> 10 mM of sodium formate, and were exposed to atmospheric O <sub>2</sub> , for 34 min, and then flash cooled in liquid nitrogen (W-O=O...SeCys form). |
| HP_CO <sub>2</sub><br>PDB_ID: 8RCC           | <i>DvFdhAB</i> aerobically crystallized <b>without</b> sodium formate; the crystals were pressurised with 48 bar of CO <sub>2</sub> , and then flash cooled in liquid nitrogen, under 200 bar helium (W-O=O...SeCys form).                                                                                                                              |

**Table S 2- Distances between the W ion, Se atom of SeCys and the (di)oxygen ligand atom(s) for the Control\_Red , Reox\_120min, Reox\_ND\_NoFormate, Reox\_ND\_Formate and HP\_CO<sub>2</sub> structures (with respective crystallographic resolutions) and of the optimized W<sup>V</sup> structural models (Figure S12).**

| <b>Bond length and distance (in Å)</b> | <b>W-S<sub>sulfido</sub></b> | <b>W-O<sub>dioxygen</sub></b> | <b>W---Se</b> | <b>O-O<sub>dioxygen</sub></b> | <b>O---Se</b> |
|----------------------------------------|------------------------------|-------------------------------|---------------|-------------------------------|---------------|
| Control_Red (2.00 Å)(8RC8)             | 2.31                         | n.a.                          | 2.56          | n.a.                          | n.a.          |
| Reox_120min (2.06 Å)(8RC9)             | 2.17                         | 2.34 2.52                     | 4.20          | 1.23                          | 2.46 2.57     |
| Reox_ND_NoFormate (1.66 Å)(8RCA)       | 1.96                         | n.a.                          | 2.60          | n.a.                          | n.a.          |
| Reox_ND_Formate (2.11 Å)(8RCB)         | 2.27                         | 2.32 2.64                     | 4.48          | 1.21                          | 2.62 3.01     |
| HP_CO <sub>2</sub> (2.30 Å)(8RCC)      | 2.82                         | 2.43 1.93                     | 3.69          | 1.22                          | 2.19 2.89     |
| Model 1                                | 2.204                        | 1.968 2.496                   | 4.792         | 1.406                         | 2.673 3.525   |
| Model 2                                | 2.168                        | 2.805 2.128                   | 5.400         | 1.298                         | 3.606 4.127   |
| Model 3                                | 2.470                        | 1.946 2.038                   | 4.556         | 1.428                         | 2.882 3.791   |
| Model 7                                | 2.174                        | 2.237 (water)                 | 4.925         | n.a.                          | 3.081         |

**Table S 3- B-factor values for the W ion, sulfido ligand (S), the four sulfur atoms of the 2 dithiolenes, Se atom of SeCys and the two atoms of the dioxygen molecule for the Control\_Red, Reox\_12min, Reox\_120min, Reox\_ND\_No\_Formate, Reox\_ND\_Formate and HP\_CO<sub>2</sub> structures and respective resolutions.**

| <b>B-factor (Å<sup>2</sup>)</b> | <b>Control_Red<br/>(2.00 Å)</b> | <b>Reox_12min<br/>(1.91 Å)</b> | <b>Reox_120min<br/>(2.06 Å)</b> | <b>Reox_ND_No<br/>_Formate<br/>(1.66 Å)</b> | <b>Reox_ND_<br/>Formate<br/>(2.11 Å)</b> | <b>HP_CO<sub>2</sub><br/>(2.30 Å)</b> |
|---------------------------------|---------------------------------|--------------------------------|---------------------------------|---------------------------------------------|------------------------------------------|---------------------------------------|
| <b>W</b>                        | 24.09                           | 24.75                          | 35.67                           | 21.05                                       | 33.75                                    | 30.77                                 |
| <b>S</b>                        | 28.66                           | 26.61                          | 58.88                           | 18.74                                       | 60.37                                    | 43.89                                 |
| <b>S12<sub>MGD1</sub></b>       | 22.13                           | 21.90                          | 29.10                           | 21.74                                       | 24.24                                    | 26.59                                 |
| <b>S13<sub>MGD1</sub></b>       | 21.80                           | 24.55                          | 30.23                           | 21.88                                       | 24.30                                    | 27.26                                 |
| <b>S12<sub>MGD2</sub></b>       | 24.31                           | 26.19                          | 32.19                           | 21.22                                       | 37.30                                    | 29.81                                 |
| <b>S13<sub>MGD2</sub></b>       | 23.65                           | 25.26                          | 36.35                           | 20.72                                       | 29.61                                    | 26.54                                 |
| <b>Se</b>                       | 25.54                           | 29.30                          | 53.55                           | 25.10                                       | 92.48                                    | 75.80                                 |
| <b>Cβ<sub>U192</sub></b>        | 27.58                           | 30.10                          | 49.66                           | 24.37                                       | 55.09                                    | 56.78                                 |
| <b>Cα<sub>U192</sub></b>        | 28.29                           | 29.85                          | 44.20                           | 24.09                                       | 40.43                                    | 49.87                                 |
| <b>O1</b>                       | NA                              | NA                             | 44.42                           | NA                                          | 25.44                                    | 32.52                                 |
| <b>O2</b>                       | NA                              | NA                             | 32.91                           | NA                                          | 39.70                                    | 33.80                                 |

**Table S 4- Crystallographic data processing and refinement statistics.**

| Crystal                                            | Control_Red                                   | Reox_120min                                   | Reox_120min_Staraniso                         |
|----------------------------------------------------|-----------------------------------------------|-----------------------------------------------|-----------------------------------------------|
| PDB <sub>code</sub>                                | 8RC8                                          |                                               | 8RC9                                          |
| <b>Diffraction Data</b>                            |                                               |                                               |                                               |
| Space group                                        | P2 <sub>1</sub> 2 <sub>1</sub> 2 <sub>1</sub> | P2 <sub>1</sub> 2 <sub>1</sub> 2 <sub>1</sub> | P2 <sub>1</sub> 2 <sub>1</sub> 2 <sub>1</sub> |
| Cell dimensions (Å)<br>(°)                         | a=64.99, b=124.35,<br>c=149.90                | a=65.18, b=127.93,<br>c=149.47                | a=65.18, b=127.93,<br>c=149.47                |
| Wavelength (Å)                                     | 0.9686                                        | 0.9686                                        | 0.9686                                        |
| Beamline                                           | ESRF ID30B                                    | ESRF ID30B                                    | ESRF ID30B                                    |
| No. Crystals                                       | 1                                             | 1                                             | 1                                             |
| Resolution range of<br>data (Å) (last shell)       | 47.85 – 2.00<br>(2.04 – 2.00)                 | 97.19 – 2.28<br>(2.32 – 2.28)                 | 97.19 – 2.06<br>(2.15 – 2.06)                 |
| Completeness (%)<br>(last shell)                   | 99.60 (92.40)                                 | 96.52 (98.31)                                 | 87.87 (49.15)                                 |
| Rmerge (last shell)                                | 0.182 (1.224)                                 | 0.110 (0.658)                                 | 0.119 (1.110)                                 |
| Rmeas (last shell)                                 | 0.214 (1.429)                                 | 0.127 (0.758)                                 | 0.137 (1.241)                                 |
| I/σI (last shell)                                  | 6.6 (1.3)                                     | 7.9 (2.1)                                     | 7.0 (1.5)                                     |
| CC 1/2 (last shell)                                | 0.994 (0.527)                                 | 0.991 (0.632)                                 | 0.991 (0.495)                                 |
| Redundancy (last<br>shell)                         | 7.0 (6.6)                                     | 4.1 (4.2)                                     | 4.3 (5.1)                                     |
|                                                    |                                               |                                               |                                               |
| <b>Refinement</b>                                  |                                               |                                               |                                               |
| Reflections used in<br>refinement (work<br>(free)) | 77848 (4152)                                  |                                               | 65087 (3244)                                  |
| Rwork                                              | 0.183                                         |                                               | 0.206                                         |
| Rfree                                              | 0.219                                         |                                               | 0.255                                         |
| Nº of non-hydrogen<br>atoms                        | 9804                                          |                                               | 9587                                          |
| Protein                                            | 9205                                          |                                               | 9224                                          |
| Ligands                                            | 175                                           |                                               | 154                                           |
| Ions                                               | 2                                             |                                               | 2                                             |
| Solvent                                            | 422                                           |                                               | 207                                           |
| <b>Geometry and B-<br/>factors</b>                 |                                               |                                               |                                               |
| RMSD bond lengths<br>(Å)                           | 0.004                                         |                                               | 0.005                                         |
| RMSD bond angles<br>(°)                            | 1.052                                         |                                               | 1.393                                         |
| Average B-factor ALL<br>(Å <sup>2</sup> )          | 31.24                                         |                                               | 40.72                                         |
| Protein (Å <sup>2</sup> )                          | 33.28                                         |                                               | 43.64                                         |
| Ligands (Å <sup>2</sup> )                          | 31.06                                         |                                               | 34.28                                         |
| Ions (Å <sup>2</sup> )                             | 26.38                                         |                                               | 47.27                                         |
| Solvent (Å <sup>2</sup> )                          | 33.34                                         |                                               | 33.82                                         |
| Ramachandran<br>favoured (%)                       | 96.32                                         |                                               | 95.47                                         |
| Ramachandran<br>outliers (%)                       | 0.17                                          |                                               | 0.34                                          |
| Molprobit score                                    | 1.26                                          |                                               | 1.50                                          |
| Clashscore                                         | 2.38                                          |                                               | 2.98                                          |

| Crystal                                            | Reox_ND_NoFormate                             | Reox_ND_Formate                               | Reox_ND_Formate_Staraniso                     |
|----------------------------------------------------|-----------------------------------------------|-----------------------------------------------|-----------------------------------------------|
| PDB <sub>code</sub>                                | 8RCA                                          |                                               | 8RCB                                          |
| <b>Diffraction Data</b>                            |                                               |                                               |                                               |
| Space group                                        | P2 <sub>1</sub> 2 <sub>1</sub> 2 <sub>1</sub> | P2 <sub>1</sub> 2 <sub>1</sub> 2 <sub>1</sub> | P2 <sub>1</sub> 2 <sub>1</sub> 2 <sub>1</sub> |
| Cell dimensions (Å)<br>(°)                         | a=64.56, b=128.01,<br>c=148.91                | a=64.43, b=123.09,<br>c=148.14                | a=64.43, b=123.09, c=148.14                   |
| Wavelength (Å)                                     | 0.7749                                        | 0.9686                                        | 0.9686                                        |
| Beamline                                           | ESRF ID23-1                                   | ESRF ID30B                                    | ESRF ID30B                                    |
| No. Crystals                                       | 1                                             | 1                                             | 1                                             |
| Resolution range of<br>data (Å) (last shell)       | 97.26 – 1.66<br>(1.79 – 1.66)                 | 94.67 – 2.42<br>(2.46 – 2.42)                 | 94.67 – 2.11<br>(2.28 – 2.11)                 |
| Completeness (%)<br>(last shell)                   | 90.60 (53.30)                                 | 98.64 (98.80)                                 | 91.15 (40.48)                                 |
| Rmerge (last shell)                                | 0.104 (1.098)                                 | 0.140 (1.070)                                 | 0.153 (1.187)                                 |
| Rmeas (last shell)                                 | 0.117 (1.201)                                 | 0.149 (1.132)                                 | 0.163 (1.279)                                 |
| I/σ (last shell)                                   | 7.9 (1.5)                                     | 10.4 (2.1)                                    | 8.4 (1.6)                                     |
| CC 1/2 (last shell)                                | 0.996 (0.658)                                 | 0.996 (0.774)                                 | 0.996 (0.591)                                 |
| Redundancy (last<br>shell)                         | 4.66 (6.12)                                   | 9.0 (9.4)                                     | 8.9 (7.3)                                     |
|                                                    |                                               |                                               |                                               |
| <b>Refinement</b>                                  |                                               |                                               |                                               |
| Reflections used in<br>refinement (work<br>(free)) | 102948 (5448)                                 |                                               | 54095 (2723)                                  |
| Rwork                                              | 0.196                                         |                                               | 0.199                                         |
| Rfree                                              | 0.232                                         |                                               | 0.240                                         |
| N <sup>o</sup> of non-hydrogen<br>atoms            | 9971                                          |                                               | 9410                                          |
| Protein                                            | 9228                                          |                                               | 9153                                          |
| Ligands                                            | 172                                           |                                               | 161                                           |
| Ions                                               | 2                                             |                                               | 2                                             |
| Solvent                                            | 569                                           |                                               | 94                                            |
| <b>Geometry and B-<br/>factors</b>                 |                                               |                                               |                                               |
| RMSD bond lengths<br>(Å)                           | 0.008                                         |                                               | 0.003                                         |
| RMSD bond angles<br>(°)                            | 1.511                                         |                                               | 1.212                                         |
| Average B-factor ALL<br>(Å <sup>2</sup> )          | 30.65                                         |                                               | 38.68                                         |
| Protein (Å <sup>2</sup> )                          | 32.60                                         |                                               | 41.18                                         |
| Ligands (Å <sup>2</sup> )                          | 25.27                                         |                                               | 33.93                                         |
| Ions (Å <sup>2</sup> )                             | 19.89                                         |                                               | 47.06                                         |
| Solvent (Å <sup>2</sup> )                          | 33.35                                         |                                               | 28.54                                         |
| Ramachandran<br>favoured (%)                       | 96.33                                         |                                               | 95.85                                         |
| Ramachandran<br>outliers (%)                       | 0.26                                          |                                               | 0.17                                          |
| Molprobit score                                    | 1.54                                          |                                               | 1.20                                          |
| Clashscore                                         | 4.43                                          |                                               | 1.63                                          |



| Crystal                                            | HP_CO <sub>2</sub>                            | HP_CO <sub>2</sub> _Staraniso                 |
|----------------------------------------------------|-----------------------------------------------|-----------------------------------------------|
| PDB <sub>code</sub>                                |                                               | 8RCC                                          |
| <b>Diffraction Data</b>                            |                                               |                                               |
| Space group                                        | P2 <sub>1</sub> 2 <sub>1</sub> 2 <sub>1</sub> | P2 <sub>1</sub> 2 <sub>1</sub> 2 <sub>1</sub> |
| Cell dimensions (Å)<br>(°)                         | a=64.81, b=124.40,<br>c=150.31                | a=64.81, b=124.40, c=150.31                   |
| Wavelength (Å)                                     | 0.9677                                        | 0.9677                                        |
| Beamline                                           | ESRF ID30A-3                                  | ESRF ID30A-3                                  |
| No. Crystals                                       | 1                                             | 1                                             |
| Resolution range of<br>data (Å) (last shell)       | 95.84 – 2.66<br>(2.70 – 2.66)                 | 95.84 – 2.30<br>(2.44 – 2.30)                 |
| Completeness (%)<br>(last shell)                   | 96.26 (99.05)                                 | 89.19 (45.52)                                 |
| Rmerge (last shell)                                | 0.194 (0.901)                                 | 0.239 (1.421)                                 |
| Rmeas (last shell)                                 | 0.214 (0.995)                                 | 0.264 (1.546)                                 |
| I/σ (last shell)                                   | 8.1 (2.1)                                     | 6.5 (1.4)                                     |
| CC 1/2 (last shell)                                | 0.986 (0.639)                                 | 0.985 (0.465)                                 |
| Redundancy (last<br>shell)                         | 5.5 (5.5)                                     | 5.6 (6.3)                                     |
|                                                    |                                               |                                               |
| <b>Refinement</b>                                  |                                               |                                               |
| Reflections used in<br>refinement (work<br>(free)) |                                               | 42746 (2267)                                  |
| Rwork                                              |                                               | 0.194                                         |
| Rfree                                              |                                               | 0.244                                         |
| N <sup>o</sup> of non-hydrogen<br>atoms            |                                               | 9544                                          |
| Protein                                            |                                               | 9193                                          |
| Ligands                                            |                                               | 246                                           |
| Ions                                               |                                               | 2                                             |
| Solvent                                            |                                               | 103                                           |
| <b>Geometry and B-<br/>factors</b>                 |                                               |                                               |
| RMSD bond lengths<br>(Å)                           |                                               | 0.005                                         |
| RMSD bond angles<br>(°)                            |                                               | 1.360                                         |
| Average B-factor ALL<br>(Å <sup>2</sup> )          |                                               | 33.54                                         |
| Protein (Å <sup>2</sup> )                          |                                               | 35.93                                         |
| Ligands (Å <sup>2</sup> )                          |                                               | 35.28                                         |
| Ions (Å <sup>2</sup> )                             |                                               | 37.33                                         |
| Solvent (Å <sup>2</sup> )                          |                                               | 25.44                                         |
| Ramachandran<br>favoured (%)                       |                                               | 94.86                                         |
| Ramachandran<br>outliers (%)                       |                                               | 0.34                                          |
| Molprobit score                                    |                                               | 1.93                                          |
| Clashscore                                         |                                               | 5.17                                          |

**Table S 5- DFT-predicted g-values for the optimized W<sup>V</sup> structural models (Figure S12).**

| <b>Model</b> | <b>Calculated g-values</b> |       |       |
|--------------|----------------------------|-------|-------|
| 1            | 2.189                      | 2.049 | 2.026 |
| 2            | 2.019                      | 2.013 | 2.013 |
| 3            | 2.616                      | 2.171 | 2.057 |
| 4            | n.d. <sup>1</sup>          |       |       |
| 5            | n.d. <sup>1</sup>          |       |       |
| 6            | n.d. <sup>1</sup>          |       |       |
| 7            | 1.931                      | 1.927 | 1.891 |
| 8            | n.d. <sup>1</sup>          |       |       |

<sup>1</sup>for these models, the optimized structure cannot fit with the rest of the protein due to strong distortions of dithiolene moieties.

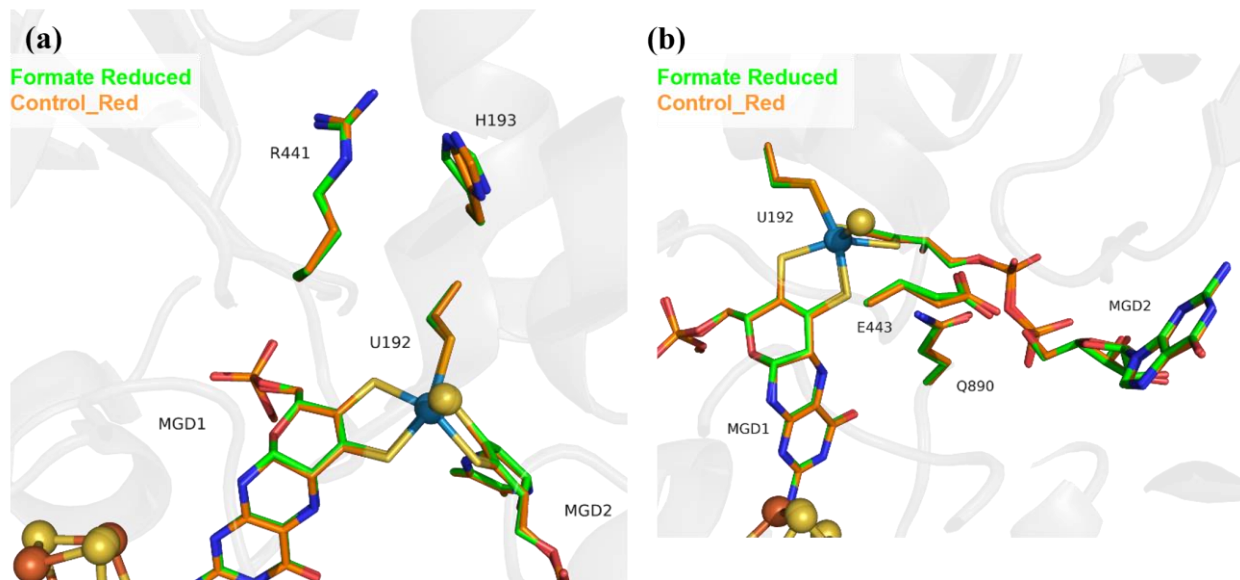

**Figure S 1- Superposition of *DvFdhAB* WT formate reduced (PDB\_ID: 6SDV) (green) and Control\_Red structure (orange) in two different views.**

Rmsd is 0.21 Å for 964 C $\alpha$  atoms of *DvFdhA*, and of 0.19 Å for 214 C $\alpha$  atoms of *DvFdhB*. **(a)** U192, H193, R441 and the two MGD co-factors are shown as sticks. **(b)** U192, E443, Q890 and the two MGD co-factors are shown as sticks.

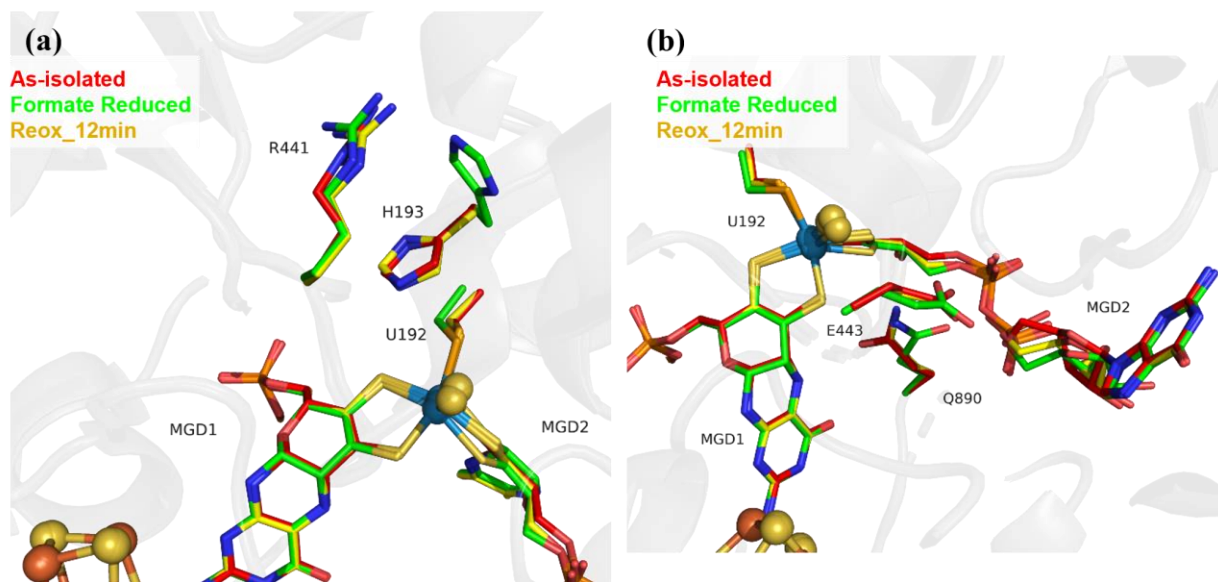

**Figure S 2- Superposition of *DvFdhAB* WT WT as-isolated (oxidized) (PDB\_ID: 6SDR) (red), formate reduced (green) and oxygen exposed Reox\_12min structure (yellow) in two different views.** Rmsd is 0.15 Å for 963 C $\alpha$  atoms of *DvFdhA*, and of 0.17 Å for 214 C $\alpha$  atoms of *DvFdhB*. **(a)** U192, H193, R441 and the two MGD co-factors are shown as sticks. **(b)** U192, E443, Q890 and the two MGD co-factors are shown as sticks.

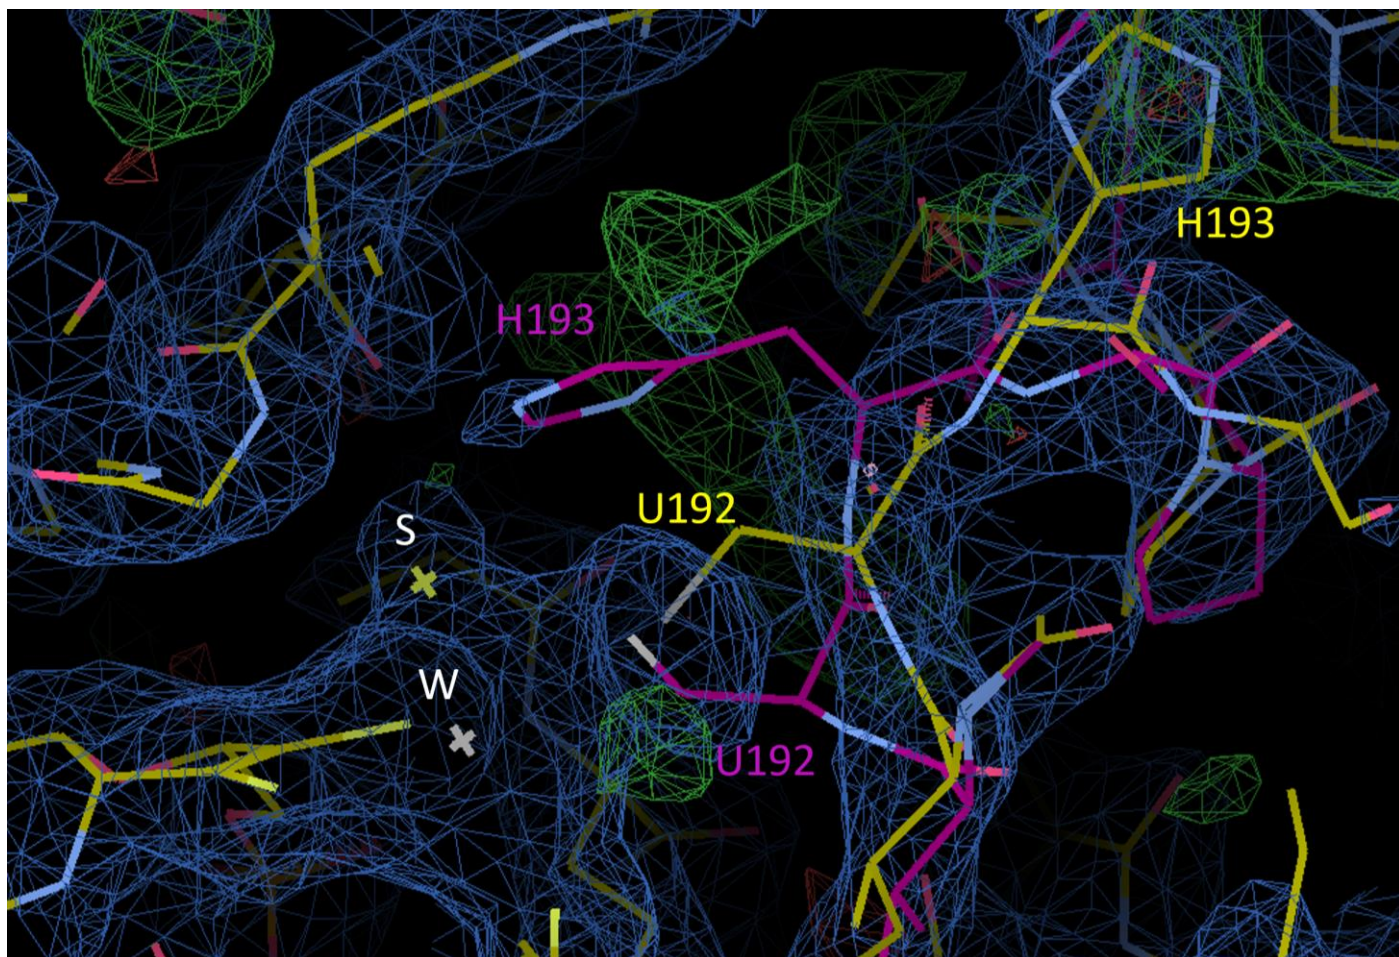

**Figure S 3- Solved, unrefined, structure obtained from the *DvFdhAB* WT crystals co-crystallized with formate and exposed to air for 20 min.**

*DvFdhAB* 20 min structure displaying a mixture of states (50%/50%) of both WT as isolated (oxidized) (magenta) (PDB\_ID: 6SDR) and Reox\_120min (yellow), near the active site (I191-S194). 2Fo-Fc maps at  $1\sigma$  (blue mesh) and Fo-Fc maps at  $3\sigma$  (green and red mesh, respectively for positive and negative densities) are shown. Image produced with Coot <sup>4</sup>.

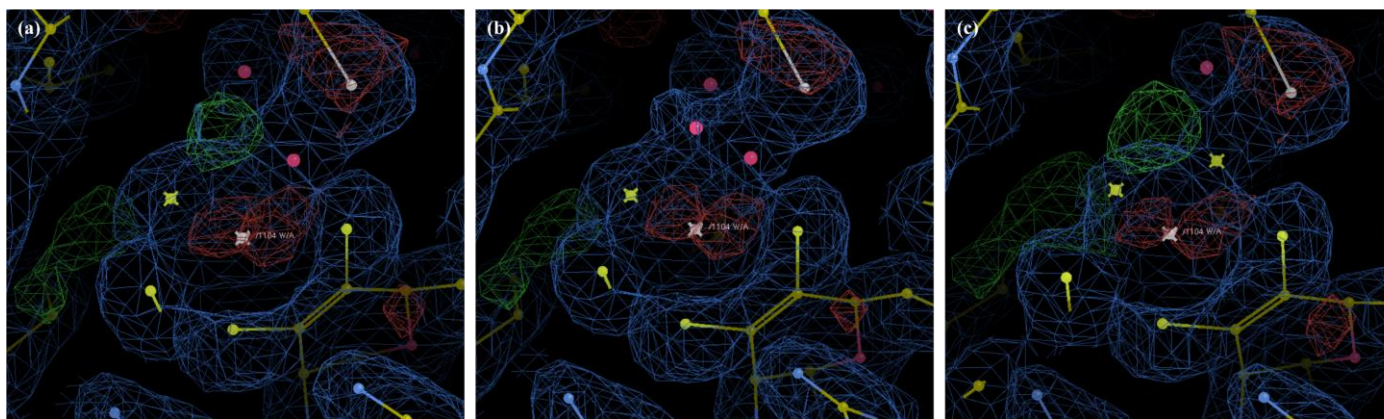

**Figure S 4- Alternative modelling of different ligands for the electron density between W and Se in the *DvFdhAB* Reox\_120min structures.**

The W ion (grey cross), SeCys Se atom (grey sphere), the two MGD co-factors (yellow lines), sulfido ligand (yellow cross) and water molecules (red sphere) are shown. 2Fo-Fc electron density map contoured at  $1\sigma$  (blue mesh) and Fo-Fc map contoured at  $3\sigma$  (green and red mesh, respectively for positive and negative density) are shown. Images produced with Coot <sup>4</sup>. **(a)** Modelling hypothesis with one water molecule at full occupancy. **(b)** Modelling hypothesis with two water molecules, each at half occupancy. **(c)** Modelling hypothesis with two sulfido ligands, each at half occupancy.

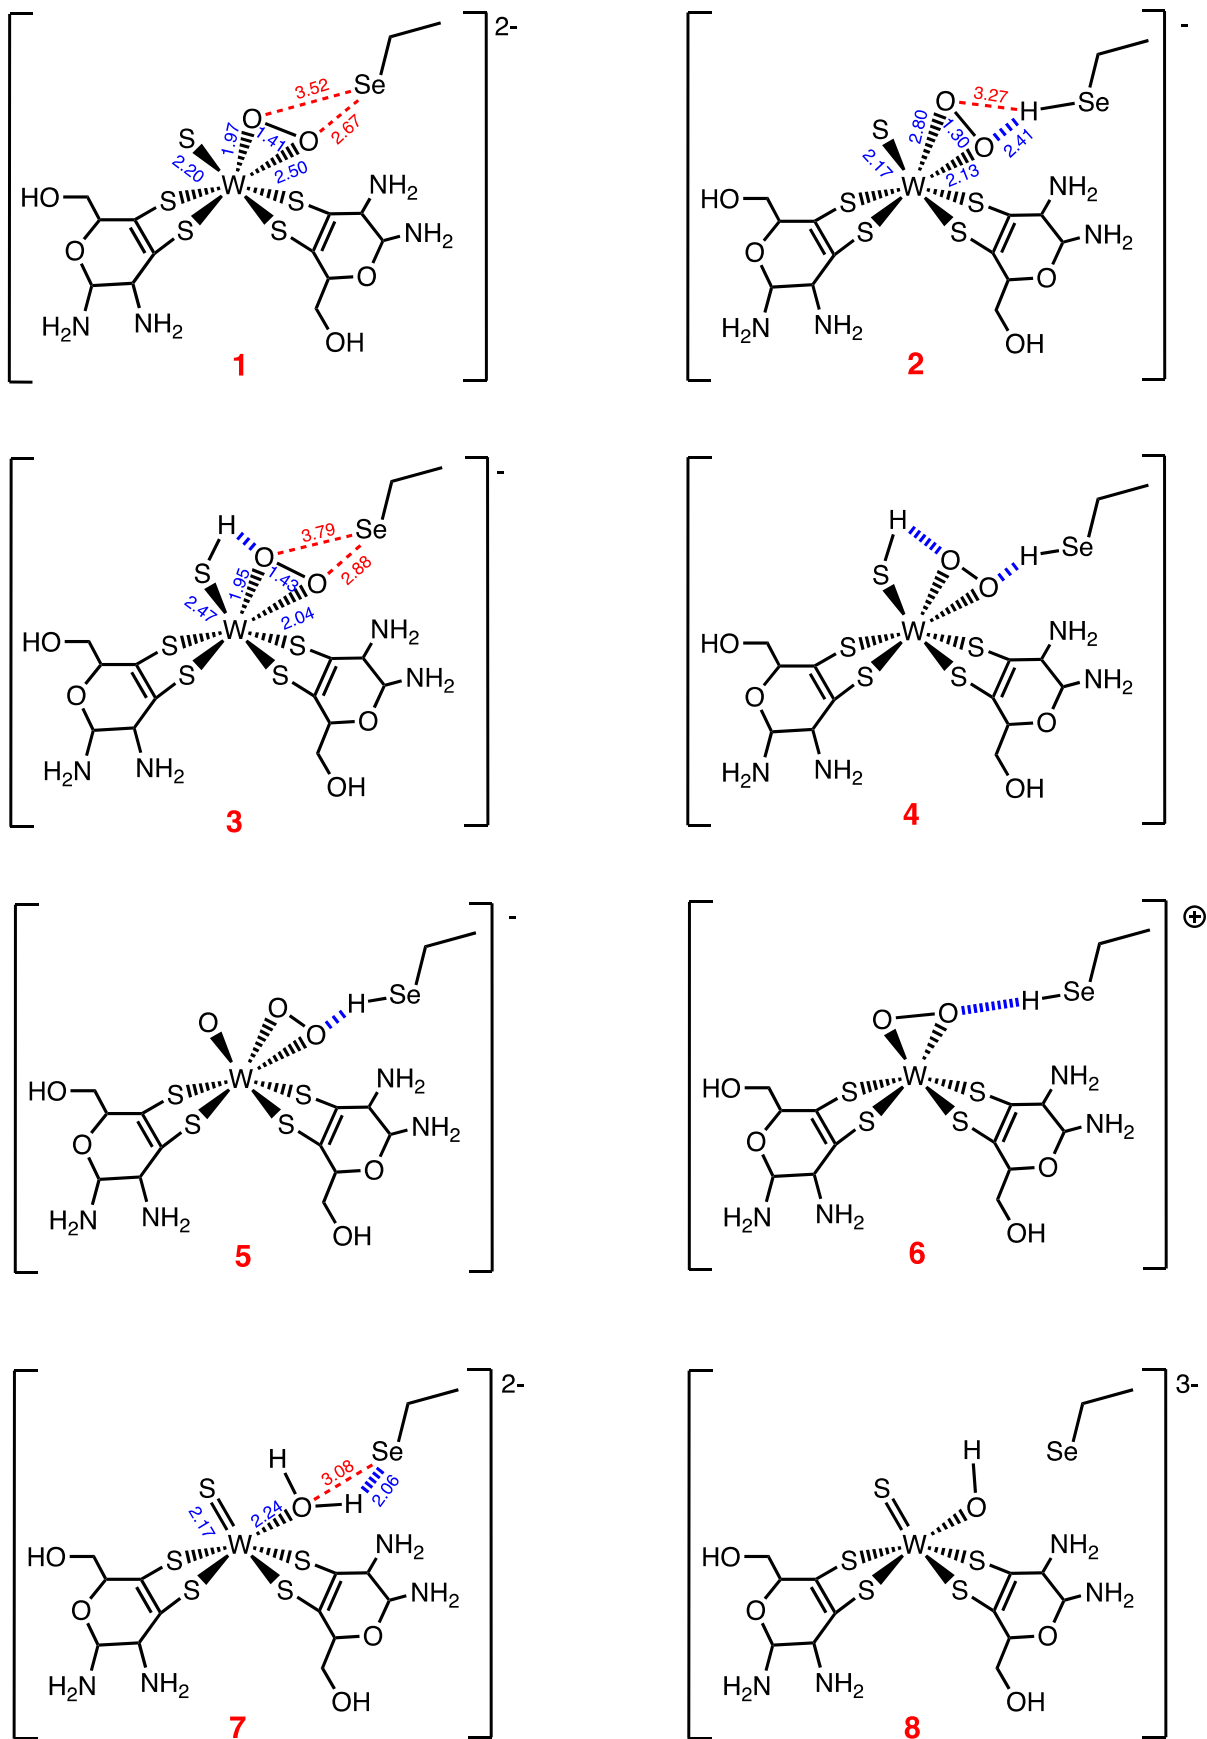

**Figure S 5- Structural models of the  $W^V$  cofactor used for DFT calculations.**

Interatomic distances were indicated, in Å, only for models leading to optimized geometry consistent with protein surrounding constraints.

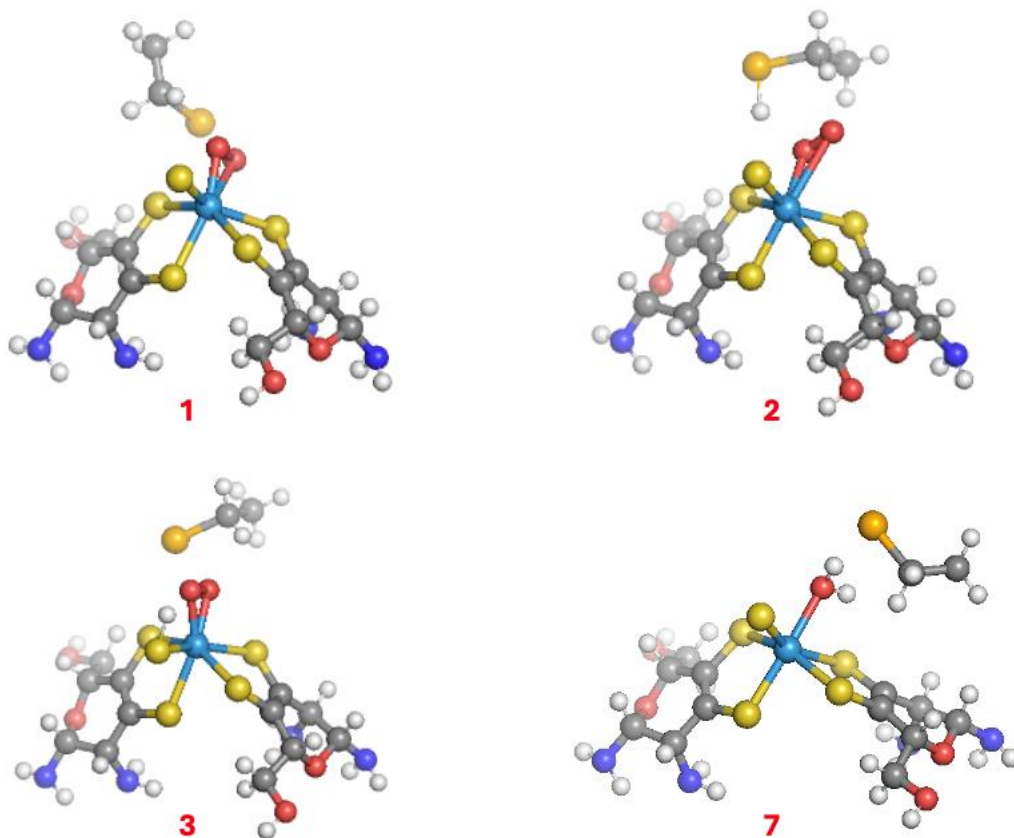

**Figure S 6- Optimized geometry of the  $W^V$  models obtained by DFT calculations.**

The W ion (cyan), Selenium atom (orange), Sulfur (yellow), carbon (dark grey), oxygen (red), nitrogen (blue) and hydrogen (white) atoms are shown as spheres.



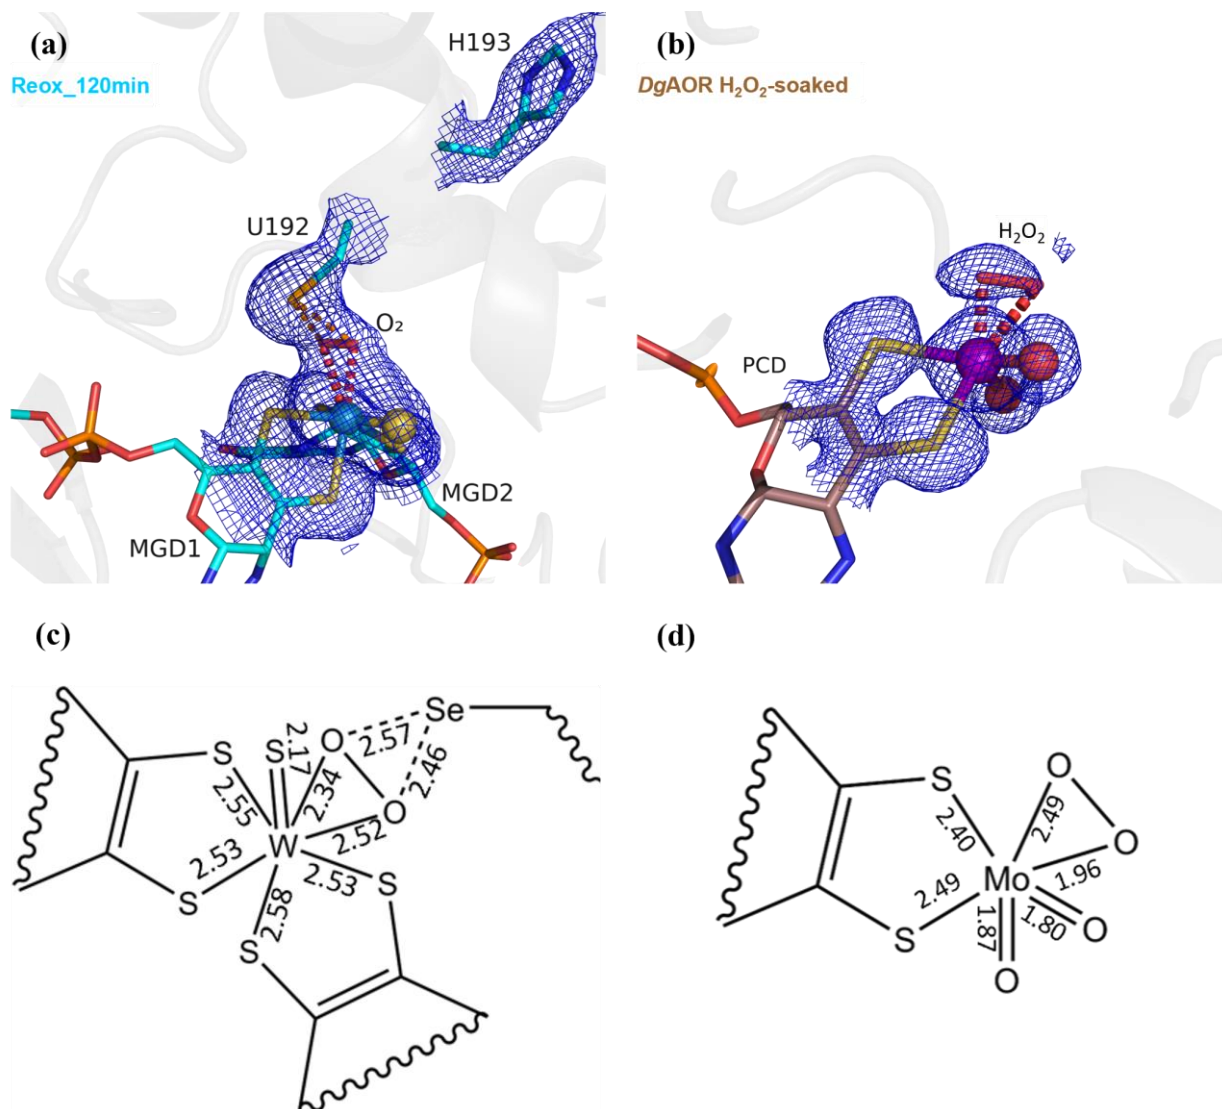

**Figure S 7- Comparison of the metal coordination between the dioxygen/peroxide containing active sites of *DvFdhAB* Reox\_120min (cyan) and *DgAOR* H<sub>2</sub>O<sub>2</sub>-soaked (PDB\_ID: 4C80) (brown).**

(a) *DvFdhAB* Reox\_120min structure (cyan) and respective electron density map (2Fo-Fc), at 1 $\sigma$  (blue mesh). U192, H193, the two MGD co-factors coordinating the W ion and the dioxygen molecule (red) are shown as sticks. (b) *DgAOR* H<sub>2</sub>O<sub>2</sub>-soaked (PDB\_ID: 4C80) structure (brown) and respective electron density map (2Fo-Fc), at 1 $\sigma$  (blue mesh). The Molybdopterin Cytosine Dinucleotide (MCD) co-factor coordinating the Mo ion, the two terminal oxo ligands and peroxide molecule (red) are shown as sticks. (c) 2D representation of the *DvFdhAB* Reox\_120min W active site, indicating the bond lengths (in Å) of relevant bonds. (d) 2D representation of the *DgAOR* H<sub>2</sub>O<sub>2</sub>-soaked (PDB\_ID: 4C80) Mo active site, indicating the bond lengths (in Å) of relevant bonds.

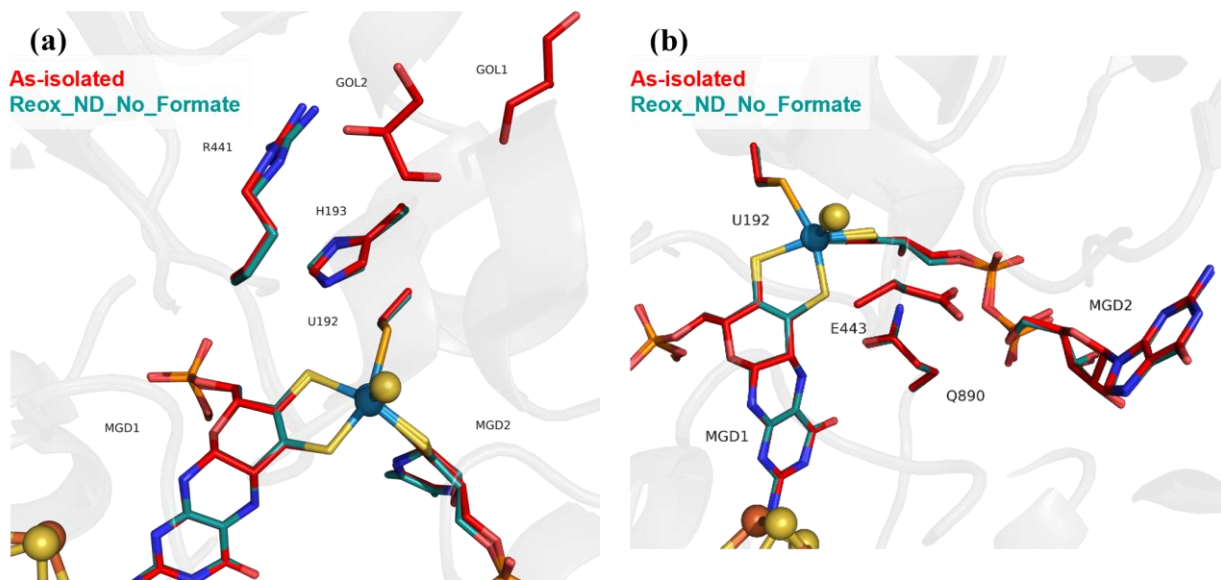

**Figure S 8- Superposition of *DvFdhAB* WT as-isolated (oxidized) (PDB\_ID: 6SDR) (red) and oxygen exposed Reox\_ND\_NoFormate structure (blue) in two different views.**

Rmsd is 0.15 Å for 963 C $\alpha$  atoms of *DvFdhA*, and of 0.15 Å for 214 C $\alpha$  atoms of *DvFdhB*. (a) U192, H193, R441, the two MGD co-factors and two glycerol molecules are shown as sticks. (b) U192, E443, Q890 and the two MGD co-factors are shown as sticks.

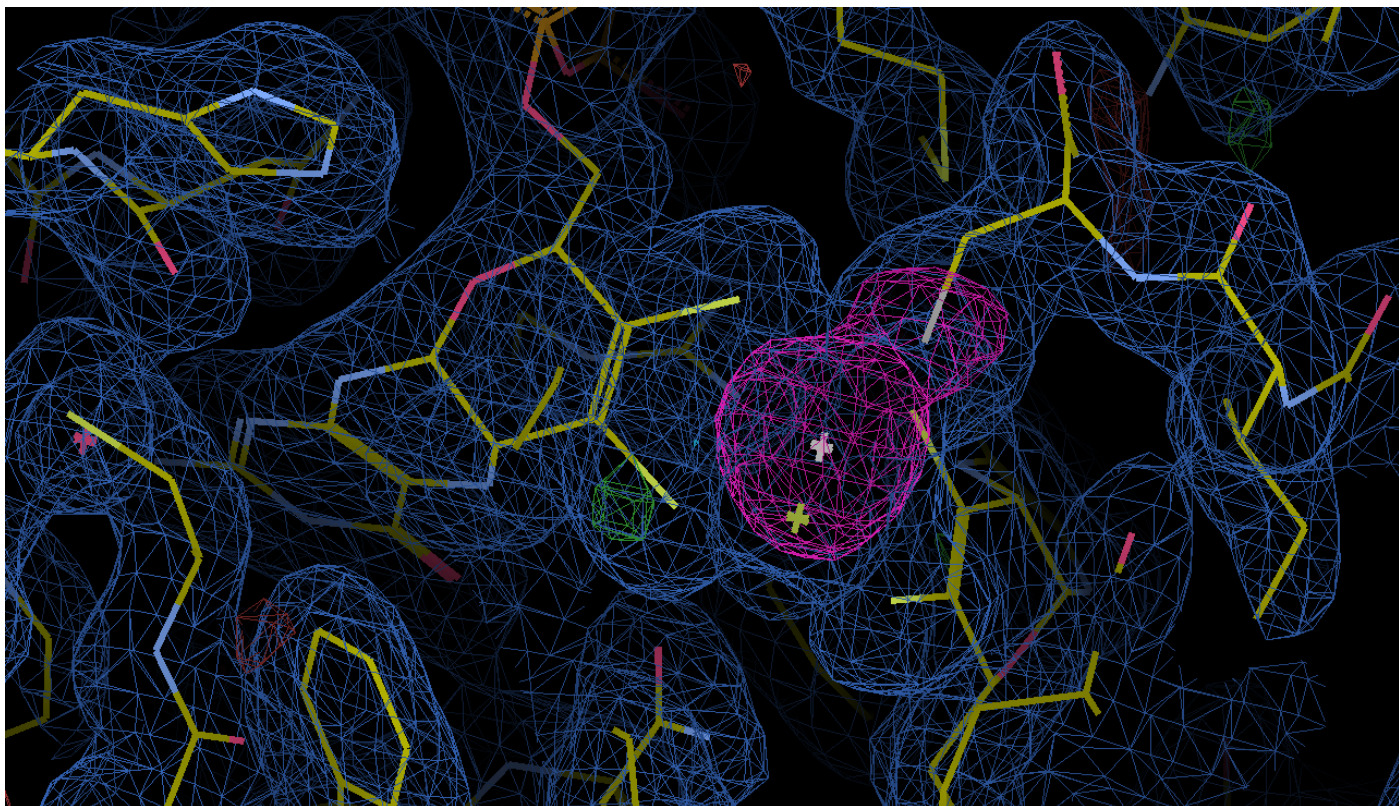

**Figure S 9- Control HP experiment with anaerobic *DvFdhAB* crystals under CO<sub>2</sub> pressure.**

Anaerobic, under CO<sub>2</sub> pressure, *DvFdhAB* structure. The W ion (grey cross), SeCys Se atom (grey line), the two MGD co-factors (yellow lines) and sulfido ligand (yellow cross) are shown. 2Fo-Fc electron density map contoured at 1 $\sigma$  (blue mesh), Fo-Fc map contoured at 3 $\sigma$  (green and red mesh, respectively for positive and negative density) and anomalous electron density map at 3  $\sigma$  (violet mesh) are shown. Image produced with Coot <sup>4</sup>.

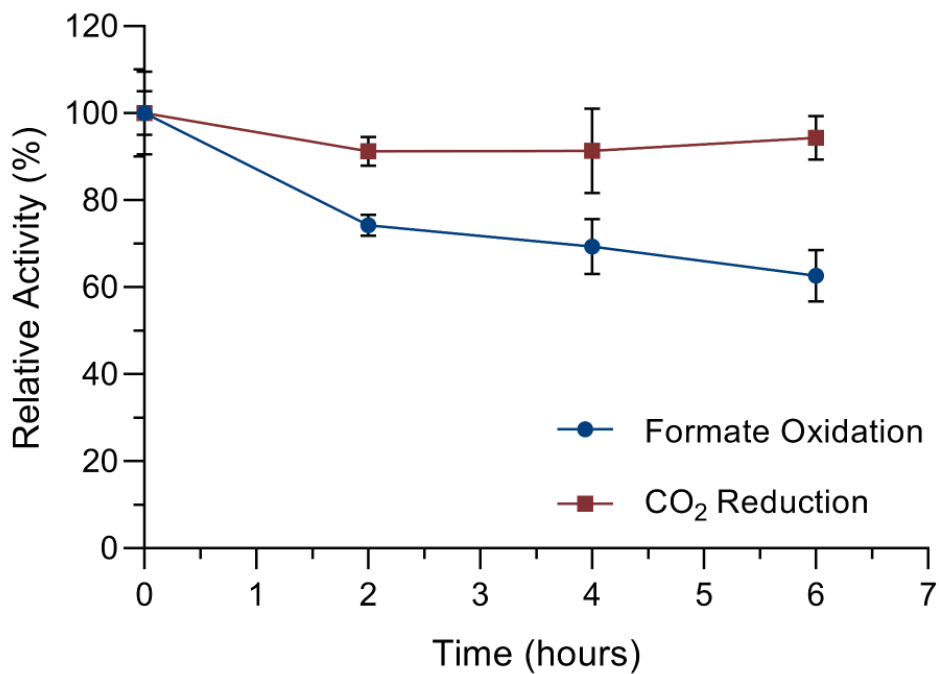

**Figure S 10- Relative activity for CO<sub>2</sub> reduction (red) and formate oxidation (blue) of as-isolated *DvFdhAB* incubated in anaerobic conditions in the presence of CO<sub>2</sub>.**

T=0h was considered as 100% of activity. Data are presented as mean values  $\pm$  s.d. (n = 3 assay technical replicates).

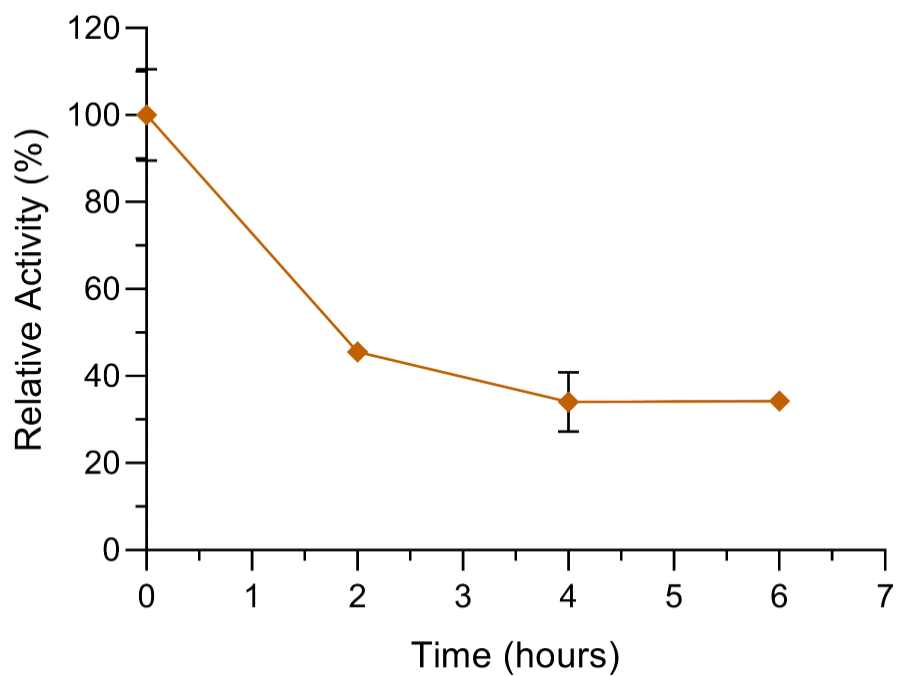

**Figure S 11- Relative activity for CO<sub>2</sub> reduction of as-isolated *DvFdhAB* incubated in aerobic conditions in the presence of CO<sub>2</sub>.**

T=0h was considered as 100% of activity. Data are presented as mean values  $\pm$  s.d. (n = 3 assay technical replicates).

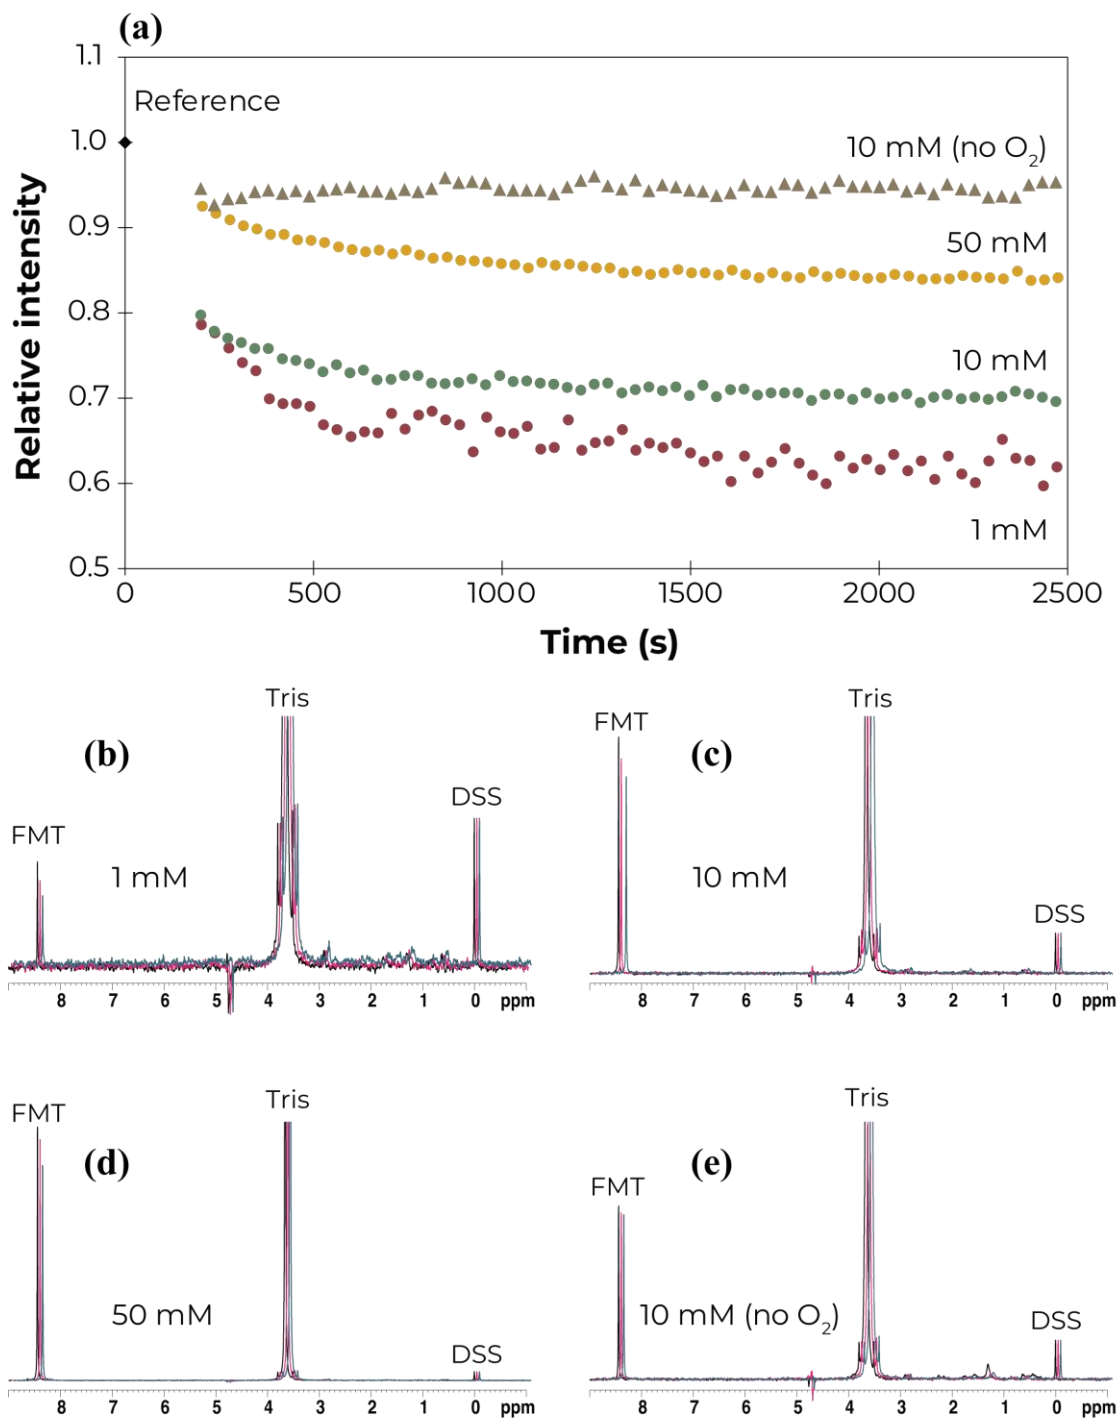

**Figure S 12- DvFdhAB activity assays by <sup>1</sup>H NMR.**

(a) The relative intensity of the <sup>1</sup>H NMR formate peak (calculated as the intensity ratio between the formate peak and that of DSS) is plotted as a function of time for the activity assays with formate concentrations of 1 mM (red circle), 10 mM (green circle), 50 mM (yellow circle); and 10 mM in the absence of atmospheric oxygen (grey triangle), the reference (which is calculated in the same way as before, but using the samples prepared in the absence of enzyme) is shown (black diamond). (b - e) Representative 1D <sup>1</sup>H spectra of each condition tested (1, 10 and 50 mM formate and 10 mM formate in the absence of atmospheric oxygen, respectively) (black: reference <sup>1</sup>H spectrum; magenta: 1st <sup>1</sup>H spectrum; blue: last <sup>1</sup>H spectrum). Above each spectra the peaks of FMT (formate), Tris (buffer) and DSS are indicated. The spectra corresponding to the 1st and last acquisition points are shifted to the right for better analysis.

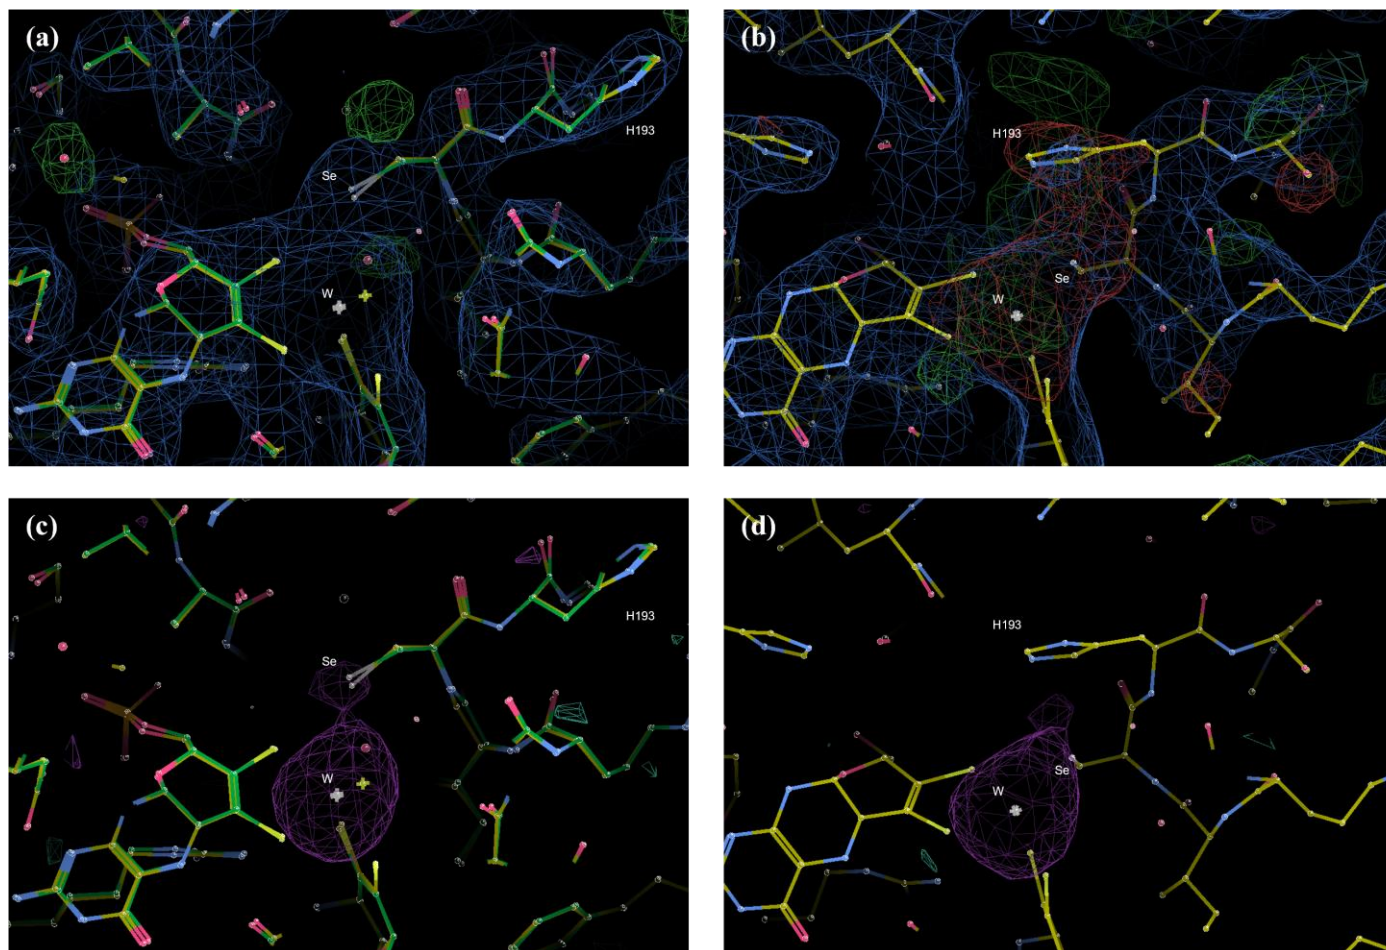

**Figure S 13- Solved, unrefined, structure (yellow) obtained from the *DvFdhAB* WT crystals produced with the concentrated solution left from the NMR experiments with formate under air, at a resolution of 2.83 Å.** 2Fo-Fc maps at 1  $\sigma$  (blue mesh), Fo-Fc maps at 3  $\sigma$  (green and red mesh, respectively for positive and negative densities) and anomalous map peaks at 3  $\sigma$  (violet mesh) are shown. Images produced with Coot<sup>4</sup>. (a) and (c) *DvFdhAB* WT “after-NMR” structure, solved using Reox\_120min as molecular replacement model (yellow), superposed with the Reox\_120min structure (green). (b) and (d) *DvFdhAB* WT “after-NMR” structure, solved using *DvFdhAB* WT as-isolated (oxidized) (PDB\_ID: 6SDR) as molecular replacement model (yellow).

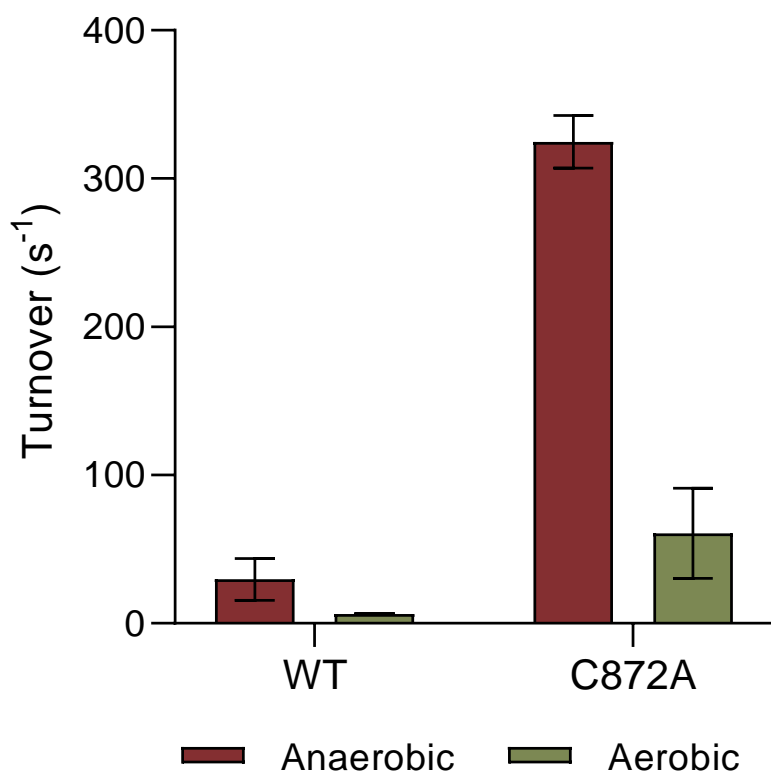

**Figure S 14- Formate oxidation activity measured in aerobic and anaerobic conditions, of as-isolated WT *DvFdhAB* and C872A variant (this variant is equivalent to the DTT-activated form <sup>5</sup>).**

The C872A variant corresponds to the active form of FdhAB, equivalent to the form obtained when pretreating the enzyme with DTT, as reported in <sup>5</sup>. With PMS + DCPIP as artificial electron acceptors in anaerobic conditions (dark red, glove box) and in aerobic conditions (green). Data are presented as mean values  $\pm$  s.d. (n = at least 3 assay technical replicates). No DTT was used in the assays. The higher error observed for the aerobic assay of the C872A variant is due to the decreasing activity of the enzyme in these conditions.



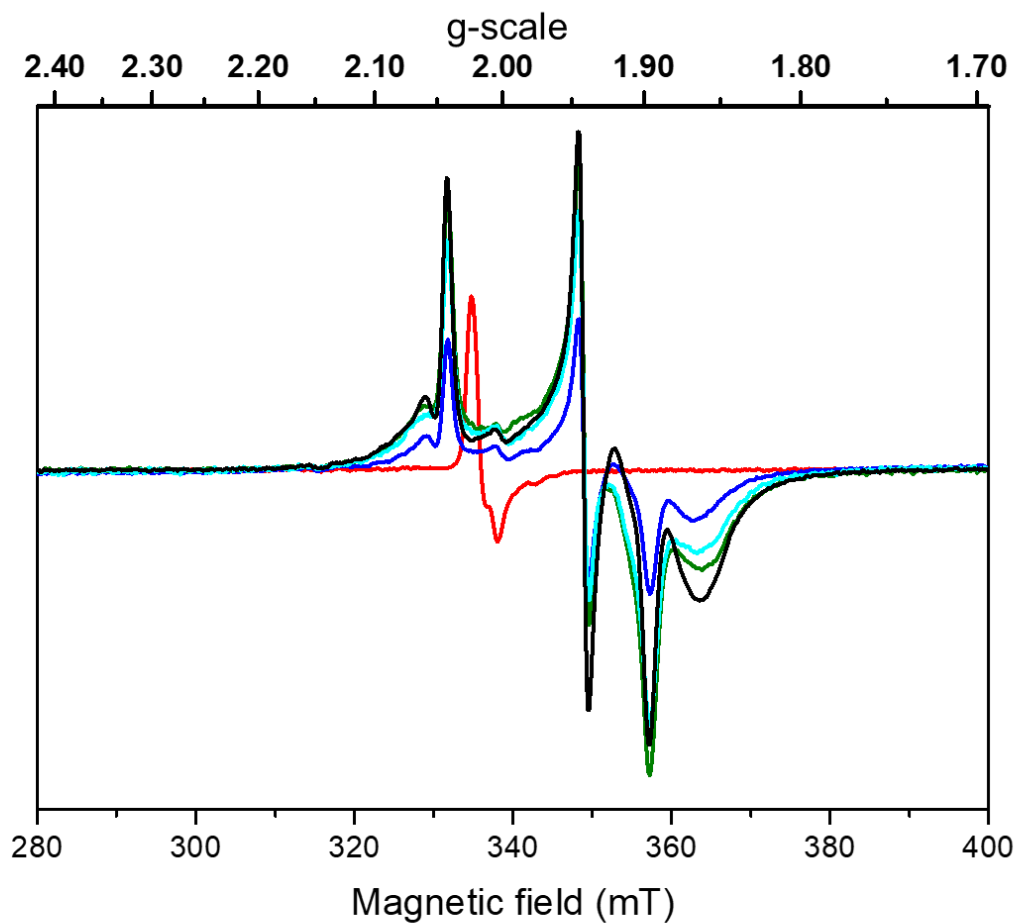

**Figure S 15- Influence of formate and oxygen exposure on FeS center EPR signals of *DvFdhAB*.**

Anaerobic reduction with formate (black trace; spin intensity reference, 100%) followed by oxygen treatment (red trace; spin intensity, 2%), then degassing and anaerobic reduction with dithionite (green trace; spin intensity, 105%) or formate (blue trace; spin intensity, 55%), and subsequent reduction of formate treated sample with dithionite (cyan trace; spin intensity, 87%). EPR conditions: Temperature, 15 K; microwave power 1 mW at 9.479 GHz, modulation amplitude 1 mT at 100 kHz.

## References

- (1) Oliveira, A. R.; Mota, C.; Klymanska, K.; Biaso, F.; Romao, M. J.; Guigliarelli, B.; Pereira, I. C. Spectroscopic and Structural Characterization of Reduced Desulfovibrio Vulgaris Hildenborough W-FdhAB Reveals Stable Metal Coordination during Catalysis. *ACS Chem Biol* **2022**, *17* (7), 1901–1909. <https://doi.org/10.1021/acscchembio.2c00336>.
- (2) Oliveira, A. R.; Mota, C.; Mourato, C.; Domingos, R. M.; Santos, M. F. A.; Gesto, D.; Guigliarelli, B.; Santos-Silva, T.; Romão, M. J.; Cardoso Pereira, I. A. Toward the Mechanistic Understanding of Enzymatic CO<sub>2</sub> Reduction. *ACS Catal* **2020**, *10* (6), 3844–3856. <https://doi.org/10.1021/acscatal.0c00086>.
- (3) Vilela-Alves, G.; Manuel, R. R.; Oliveira, A. R.; Pereira, I. C.; Romão, M. J.; Mota, C. Tracking W-Formate Dehydrogenase Structural Changes During Catalysis and Enzyme Reoxidation. *Int J Mol Sci* **2023**, *24* (1). <https://doi.org/10.3390/ijms24010476>.
- (4) Emsley, P.; Lohkamp, B.; Scott, W. G.; Cowtan, K. Features and Development of Coot. *Acta Crystallogr D Biol Crystallogr* **2010**, *66* (4), 486–501. <https://doi.org/10.1107/S0907444910007493>.
- (5) Oliveira, A. R.; Mota, C.; Vilela-Alves, G.; Manuel, R. R.; Pedrosa, N.; Fourmond, V.; Klymanska, K.; Léger, C.; Guigliarelli, B.; Romão, M. J.; Cardoso Pereira, I. A. An Allosteric Redox Switch Involved in Oxygen Protection in a CO<sub>2</sub> Reductase. *Nat Chem Biol* **2024**, No. 20, 111–119. <https://doi.org/10.1038/s41589-023-01484-2>.
